# Supplementary material for: Students in Fully Online Programs Report More Positive Attitudes toward Science Than Students in Traditional, In-Person Programs
Source: Atypon-hosted journal article supplement (doi:10.1187/cbe.16-11-0316), 2017-11-17
Supplement: combinedsupmats.pdf [file combinedsupmats.pdf]

# Supplemental Material

*CBE—Life Sciences Education*

Perera *et al.*

## Supplemental Material

### Students in fully-online programs report more positive attitudes toward science than students in traditional, in-person programs

Perera, V., Mead, C., Buxner, S., Lopatto, D., Horodyskyj, L., Semken, S. and Anbar, A.D.

**Table S1:** Factor analysis of the difference between the pre- and post-course responses to the 21 Science Attitudes items with corresponding eigenvalues shown (loadings of 0.5 or greater are shown in bold).

| Science Attitudes Item | Factor 1    | Factor 2    |
|------------------------|-------------|-------------|
| All valid              | 0.24        | 0.20        |
| Creativity             | <b>0.77</b> | -0.16       |
| Experience             | 0.30        | 0.16        |
| Just tell              | <b>0.68</b> | -0.10       |
| Missing facts          | 0.11        | 0.24        |
| No major               | <b>0.66</b> | -0.11       |
| Not connected          | <b>0.76</b> | -0.16       |
| Satisfaction           | -0.18       | <b>0.60</b> |
| Think skills           | -0.22       | <b>0.64</b> |
| True                   | 0.09        | 0.43        |
| Do well                | -0.17       | <b>0.64</b> |
| Experiment fail        | 0.27        | 0.10        |
| Explain                | -0.20       | <b>0.62</b> |
| Facts                  | 0.27        | 0.21        |
| Figure out             | <b>0.60</b> | -0.09       |
| Know before            | <b>0.66</b> | -0.01       |
| Lab confirm            | 0.20        | 0.42        |
| Only experts           | <b>0.62</b> | -0.08       |
| Statistics             | <b>0.53</b> | 0.08        |
| Straight line          | 0.37        | 0.16        |
| Work ourselves         | 0.03        | 0.39        |

**Table S2:** Factor analysis of the post-course responses to the 11 Benefits items with corresponding eigenvalues shown.

| <b>Benefits Item</b>   | <b>Factor Loading</b> |
|------------------------|-----------------------|
| Analyze                | 0.91                  |
| Demanding              | 0.88                  |
| Evidence               | 0.88                  |
| Integrate              | 0.90                  |
| Interpret              | 0.83                  |
| Knowledge construction | 0.91                  |
| Obstacle tolerance     | 0.87                  |
| Real scientists        | 0.88                  |
| Independence           | 0.74                  |
| Science                | 0.83                  |
| Scientists think       | 0.85                  |

**Table S3:** Simultaneous linear regression models for predicting the post-course *SS* factor scores (SS models) and *PV* factor scores (PV models) of the whole cohort. The reference groups for the categorical variables gender (female or male) and program type (*i-course* or *o-course*) were female and *i-course*. Listed are standardized coefficients (i.e. continuous variables were scaled and centered prior to the regression). Statistical significance (i.e.  $p < 0.05$ ) is indicated with highlighting. The Studentized Breusch-Pagan test was used to test for heteroscedasticity (when heteroscedasticity is present the p-values are marked in bold red text).

| Model SS1              |                        |         |
|------------------------|------------------------|---------|
| Variable               | Coefficient            | p-value |
| (Intercept)            | $2.783 \cdot 10^{-16}$ | 1       |
| SS Factor (pre-course) | $4.968 \cdot 10^{-1}$  | < 0.001 |

Adjusted  $R^2 = 0.2451$   
F-statistic = 147.1 on 1 and 449 DF with  $p < 0.001$   
BP = 0.3275, df = 1, p-value = 0.57

| Model SS3              |             |         |
|------------------------|-------------|---------|
| Variable               | Coefficient | p-value |
| (Intercept)            | -0.16026    | 0.024   |
| SS Factor (pre-course) | 0.45629     | < 0.001 |
| Program type           | 0.30210     | < 0.001 |
| Gender                 | 0.02819     | 0.73    |

Adjusted  $R^2 = 0.263$   
F-statistic = 54.54 on 3 and 447 DF with  $p < 0.001$   
BP = 1.4596, df = 3, p-value = 0.69

| Model SS4                                |             |         |
|------------------------------------------|-------------|---------|
| Variable                                 | Coefficient | p-value |
| (Intercept)                              | -0.15245    | < 0.01  |
| SS Factor (pre-course)                   | 0.43097     | < 0.001 |
| Program type                             | 0.29665     | < 0.001 |
| SS Factor (pre-course)<br>X Program type | 0.06335     | 0.46    |

Adjusted  $R^2 = 0.264$   
F-statistic = 54.74 on 3 and 447 DF with  $p < 0.001$   
BP = 1.6136, df = 3, p-value = 0.66

| Model PV1              |                        |         |
|------------------------|------------------------|---------|
| Variable               | Coefficient            | p-value |
| (Intercept)            | $5.154 \cdot 10^{-16}$ | 1       |
| PV Factor (pre-course) | $4.869 \cdot 10^{-1}$  | < 0.001 |

Adjusted  $R^2 = 0.2354$   
F-statistic = 139.5 on 1 and 449 DF with  $p < 0.001$   
BP = 3.9901, df = 1, p-value = **0.0458**

| Model PV3              |             |         |
|------------------------|-------------|---------|
| Variable               | Coefficient | p-value |
| (Intercept)            | -0.22015    | 0.00205 |
| PV Factor (pre-course) | 0.45890     | < 0.001 |
| Program type           | 0.29221     | < 0.001 |
| Gender                 | 0.16264     | 0.0497  |

Adjusted  $R^2 = 0.258$   
F-statistic = 53.16 on 3 and 447 DF with  $p < 0.001$   
BP = 9.8755, df = 3, p-value = **0.0197**

| Model PV4                                |             |         |
|------------------------------------------|-------------|---------|
| Variable                                 | Coefficient | p-value |
| (Intercept)                              | -0.13164    | 0.0212  |
| PV Factor (pre-course)                   | 0.52146     | < 0.001 |
| Program type                             | 0.28161     | < 0.001 |
| PV Factor (pre-course)<br>X Program type | -0.10730    | 0.19    |

Adjusted  $R^2 = 0.254$   
F-statistic = 52.19 on 3 and 447 DF with  $p < 0.001$   
BP = 5.3961, df = 3, p-value = 0.145

**Table S4:** Logistic regression models for predicting course grade of the whole cohort. Binary dependent variable was whether (1) or not (0) a student received an *A* for their course grade. The reference groups for the categorical variables gender (female or male) and program type (*i-course* or *o-course*) were female and *i-course*. Listed are standardized coefficients (i.e. continuous variables were scaled and centered prior to the regression). Statistical significance (i.e.  $p < 0.05$ ) is indicated with highlighting.

| Model GA1                      |             |         |
|--------------------------------|-------------|---------|
| Variable                       | Coefficient | p-value |
| (Intercept)                    | 0.58702     | < 0.001 |
| SS Factor (pre-course)         | 0.00738     | 0.96    |
| Program Type                   | -0.01455    | 0.94    |
| SS Factor (pre) X Program Type | 0.44155     | 0.038   |

| Model GA2                         |             |         |
|-----------------------------------|-------------|---------|
| Variable                          | Coefficient | p-value |
| (Intercept)                       | 0.580112    | < 0.001 |
| SS Factor (pre) X <i>i-course</i> | 0.005799    | 0.96    |
| SS Factor (pre) X <i>o-course</i> | 0.447192    | < 0.01  |

| Model GA3      |             |         |
|----------------|-------------|---------|
| Variable       | Coefficient | p-value |
| (Intercept)    | 0.7926      | < 0.001 |
| University GPA | 1.4777      | < 0.001 |

| Model GA4   |             |         |
|-------------|-------------|---------|
| Variable    | Coefficient | p-value |
| (Intercept) | 0.3102      | 0.019   |
| Gender      | 0.6983      | < 0.001 |

| Model GA5      |             |         |
|----------------|-------------|---------|
| Variable       | Coefficient | p-value |
| (Intercept)    | 0.3712      | 0.0196  |
| University GPA | 1.5372      | < 0.001 |
| Gender         | 0.9493      | < 0.001 |

| Model GA6      |             |         |
|----------------|-------------|---------|
| Variable       | Coefficient | p-value |
| (Intercept)    | 0.2519      | 0.203   |
| University GPA | 1.5409      | < 0.001 |
| Gender         | 0.9839      | < 0.001 |
| Program Type   | 0.2469      | 0.32    |

| Model GA7              |             |         |
|------------------------|-------------|---------|
| Variable               | Coefficient | p-value |
| (Intercept)            | 0.4136      | 0.0111  |
| University GPA         | 1.5396      | < 0.001 |
| Gender                 | 0.9125      | < 0.001 |
| SS Factor (pre-course) | 0.1403      | 0.26    |
| PV Factor (pre-course) | 0.1072      | 0.42    |

| Model GA8              |             |         |
|------------------------|-------------|---------|
| Variable               | Coefficient | p-value |
| (Intercept)            | 0.3302      | 0.11    |
| University GPA         | 1.5422      | < 0.001 |
| Gender                 | 0.9358      | < 0.001 |
| SS Factor (pre-course) | 0.1193      | 0.35    |
| PV Factor (pre-course) | 0.1091      | 0.41    |
| Program Type           | 0.1690      | 0.51    |

| Model GA9                      |             |         |
|--------------------------------|-------------|---------|
| Variable                       | Coefficient | p-value |
| (Intercept)                    | 0.27948     | 0.17    |
| University GPA                 | 1.54627     | < 0.001 |
| Gender                         | 0.95390     | < 0.001 |
| SS Factor (pre-course)         | 0.03826     | 0.80    |
| Program Type                   | 0.16083     | 0.53    |
| SS Factor (pre) X Program Type | 0.36639     | 0.16    |

| Model GA10                        |             |         |
|-----------------------------------|-------------|---------|
| Variable                          | Coefficient | p-value |
| (Intercept)                       | 0.35852     | 0.0276  |
| University GPA                    | 1.54377     | < 0.001 |
| Gender                            | 0.93084     | < 0.001 |
| SS Factor (pre) X <i>i-course</i> | 0.05588     | 0.70    |
| SS Factor (pre) X <i>o-course</i> | 0.42294     | 0.0491  |

| Model GA11      |             |         |
|-----------------|-------------|---------|
| Variable        | Coefficient | p-value |
| (Intercept)     | 0.4002      | 0.0161  |
| University GPA  | 1.5045      | < 0.001 |
| Gender          | 1.0478      | < 0.001 |
| SS Factor       | 0.5452      | < 0.001 |
| PV Factor       | 0.2505      | 0.09    |
| Benefits Factor | 0.1510      | 0.29    |

| Model GA12     |             |         |
|----------------|-------------|---------|
| Variable       | Coefficient | p-value |
| (Intercept)    | 0.3682      | 0.0245  |
| University GPA | 1.4836      | < 0.001 |
| Gender         | 1.0346      | < 0.001 |
| SS Factor      | 0.5576      | < 0.001 |

**Table S5:** Logistic regression models for predicting course grade of the whole cohort. Binary dependent variable was whether (1) or not (0) a student received a failing course grade. The reference groups for the categorical variables gender (female or male) and program type (*i-course* or *o-course*) were female and *i-course*. Listed are standardized coefficients (i.e. continuous variables were scaled and centered prior to the regression). Statistical significance (i.e.  $p < 0.05$ ) is indicated with highlighting.

| Model GF1                      |             |         |
|--------------------------------|-------------|---------|
| Variable                       | Coefficient | p-value |
| (Intercept)                    | -3.3892     | < 0.001 |
| SS Factor (pre-course)         | 0.7794      | 0.0689  |
| Program Type                   | 0.2831      | 0.5884  |
| SS Factor (pre) X Program Type | -1.2514     | 0.0230  |

| Model GF2                         |             |         |
|-----------------------------------|-------------|---------|
| Variable                          | Coefficient | p-value |
| (Intercept)                       | -3.2382     | < 0.001 |
| SS Factor (pre) X <i>i-course</i> | 0.7189      | 0.0633  |
| SS Factor (pre) X <i>o-course</i> | -0.4860     | 0.1813  |

| Model GF3      |             |         |
|----------------|-------------|---------|
| Variable       | Coefficient | p-value |
| (Intercept)    | -4.2338     | < 0.001 |
| University GPA | -1.3875     | < 0.001 |

| Model GF4   |             |         |
|-------------|-------------|---------|
| Variable    | Coefficient | p-value |
| (Intercept) | -2.9178     | < 0.001 |
| Gender      | -0.8294     | 0.125   |

| Model GF5      |             |         |
|----------------|-------------|---------|
| Variable       | Coefficient | p-value |
| (Intercept)    | -3.8872     | < 0.001 |
| University GPA | -1.4027     | < 0.001 |
| Gender         | -0.9662     | 0.11    |

| Model GF6      |             |         |
|----------------|-------------|---------|
| Variable       | Coefficient | p-value |
| (Intercept)    | -3.6419     | < 0.001 |
| University GPA | -1.5391     | < 0.001 |
| Gender         | -1.0267     | 0.0915  |
| Program Type   | -0.7672     | 0.22    |

| Model GF7              |             |         |
|------------------------|-------------|---------|
| Variable               | Coefficient | p-value |
| (Intercept)            | -4.24157    | < 0.001 |
| University GPA         | -1.39034    | < 0.001 |
| SS Factor (pre-course) | 0.08498     | 0.78    |
| PV Factor (pre-course) | -0.11029    | 0.73    |

| Model GF8              |             |         |
|------------------------|-------------|---------|
| Variable               | Coefficient | p-value |
| (Intercept)            | -4.0454     | < 0.001 |
| University GPA         | -1.5084     | < 0.001 |
| SS Factor (pre-course) | 0.1179      | 0.70    |
| PV Factor (pre-course) | -0.1117     | 0.73    |
| Program Type           | -0.6838     | 0.27    |

| Model GF9                      |             |         |
|--------------------------------|-------------|---------|
| Variable                       | Coefficient | p-value |
| (Intercept)                    | -4.0926     | < 0.001 |
| University GPA                 | -1.4799     | < 0.001 |
| SS Factor (pre-course)         | 0.6573      | 0.15    |
| Program Type                   | -0.5613     | 0.38    |
| SS Factor (pre) X Program Type | -1.0669     | 0.0684  |

| Model GF10                        |             |         |
|-----------------------------------|-------------|---------|
| Variable                          | Coefficient | p-value |
| (Intercept)                       | -4.2725     | < 0.001 |
| University GPA                    | -1.3833     | < 0.001 |
| SS Factor (pre) X <i>i-course</i> | 0.7760      | 0.10    |
| SS Factor (pre) X <i>o-course</i> | -0.3866     | 0.27    |

| Model GF11      |             |         |
|-----------------|-------------|---------|
| Variable        | Coefficient | p-value |
| (Intercept)     | -4.5833     | < 0.001 |
| University GPA  | -1.4074     | < 0.001 |
| SS Factor       | -0.5402     | 0.012   |
| PV Factor       | -0.4041     | 0.18    |
| Benefits Factor | 0.2256      | 0.57    |

| Model GF12     |             |         |
|----------------|-------------|---------|
| Variable       | Coefficient | p-value |
| (Intercept)    | -4.5184     | < 0.001 |
| University GPA | -1.4315     | < 0.001 |
| SS Factor      | -0.5105     | 0.0148  |

**Table S6:** Unpaired and unpublished CURE benchmark data for the Science Attitudes items (aggregate of over 5,000 students from the 2014-2015 academic year).

|                 | Pre-course |           | Post-course |           | Change |                                                           |
|-----------------|------------|-----------|-------------|-----------|--------|-----------------------------------------------------------|
| Item Label      | Mean       | Std. Dev. | Mean        | Std. Dev. | Mean   | Factor                                                    |
| No major        | 3.74       | 1.03      | 3.54        | 1.19      | -0.20  | <i>Scientific<br/>Sophistication<br/>(SS)<sup>+</sup></i> |
| Figure out      | 3.32       | 0.91      | 3.23        | 1.02      | -0.09  |                                                           |
| Just tell       | 3.14       | 1.09      | 3.15        | 1.15      | 0.01   |                                                           |
| Creativity      | 4.11       | 0.90      | 3.97        | 1.04      | -0.14  |                                                           |
| Not connected   | 4.00       | 0.94      | 3.85        | 1.07      | -0.15  |                                                           |
| Only experts    | 3.59       | 0.89      | 3.49        | 0.99      | -0.10  |                                                           |
| Know before     | 4.02       | 0.87      | 3.90        | 1.02      | -0.12  |                                                           |
| Statistics      | 3.16       | 1.01      | 3.21        | 1.10      | 0.05   |                                                           |
| Thinking skills | 4.10       | 0.74      | 4.07        | 0.92      | -0.03  | <i>Personal<br/>Value (PV)</i>                            |
| Satisfaction    | 4.23       | 0.77      | 4.12        | 0.95      | -0.11  |                                                           |
| Do well         | 4.01       | 0.75      | 3.90        | 0.92      | -0.11  |                                                           |
| Explain         | 4.09       | 0.81      | 4.01        | 0.92      | -0.08  |                                                           |
| True            | 3.35       | 0.87      | 3.28        | 0.98      | -0.07  | None                                                      |
| Experience      | 2.99       | 0.89      | 3.08        | 1.03      | 0.09   |                                                           |
| Missing facts   | 2.95       | 0.97      | 3.00        | 1.04      | 0.05   |                                                           |
| All valid       | 2.60       | 1.01      | 2.68        | 1.09      | 0.08   |                                                           |
| Facts           | 3.11       | 0.97      | 3.10        | 1.04      | -0.01  |                                                           |
| Experiment fail | 1.86       | 0.86      | 1.92        | 1.02      | 0.06   |                                                           |
| Straight line   | 3.05       | 0.90      | 3.22        | 0.98      | 0.17   |                                                           |
| Work ourselves  | 3.26       | 0.95      | 3.35        | 1.00      | 0.09   |                                                           |
| Lab confirm     | 3.72       | 0.81      | 3.59        | 0.98      | -0.13  |                                                           |
| Write           | 3.94       | 0.73      | 3.86        | 0.90      | -0.08  | Excluded                                                  |

<sup>+</sup>Items in this factor are reverse scored

Benchmark Cronbach Alpha values for the 22 Science Attitudes items:

Pre-course = 0.72

Post-course = 0.87

This benchmark data does not include the results of this work.

**Table S7:** Unpaired and unpublished CURE benchmark data for the Benefits items (aggregate of over 5,000 students from the 2014-2015 academic year)

| Item Label             | Mean | Std. Dev. | Factor          |
|------------------------|------|-----------|-----------------|
| Interpret              | 3.52 | 1.04      | <i>Benefits</i> |
| Obstacle tolerance     | 3.49 | 1.05      |                 |
| Demanding              | 3.40 | 1.09      |                 |
| Knowledge construction | 3.41 | 1.06      |                 |
| Integrate              | 3.44 | 1.05      |                 |
| Real scientists        | 3.57 | 1.08      |                 |
| Evidence               | 3.62 | 1.07      |                 |
| Analyze                | 3.72 | 1.02      |                 |
| Science                | 3.57 | 1.07      |                 |
| Scientists think       | 3.39 | 1.10      |                 |
| Independence           | 3.33 | 1.16      |                 |
| Career                 | 2.94 | 1.24      | Excluded        |
| Your field             | 3.44 | 1.12      |                 |
| Ethical                | 3.11 | 1.22      |                 |
| Lab techniques         | 3.73 | 1.10      |                 |
| Self confidence        | 3.18 | 1.23      |                 |
| Learning community     | 3.44 | 1.14      |                 |
| Teacher                | 2.90 | 1.27      |                 |
| Primary literature     | 3.32 | 1.17      |                 |
| Oral                   | 3.10 | 1.25      |                 |
| Writing                | 3.29 | 1.18      |                 |



**Table S8:** Science Attitudes and Benefits factor scores by degree program type along with CURE benchmark data.

|                                                    |                 | Mean Values <sup>1</sup> |             |                     |
|----------------------------------------------------|-----------------|--------------------------|-------------|---------------------|
|                                                    | Factor          | Pre-course               | Post-course | Change <sup>2</sup> |
| Full cohort<br>(n = 451)                           | <i>SS</i>       | 3.74                     | 3.59        | -0.16**             |
|                                                    | <i>PV</i>       | 3.94                     | 4.05        | 0.11***             |
|                                                    | <i>Benefits</i> | --                       | 3.69        | --                  |
| <i>o-course</i> students<br>(n <sub>o</sub> = 219) | <i>SS</i>       | 3.91                     | 3.83        | -0.08               |
|                                                    | <i>PV</i>       | 4.00                     | 4.19        | 0.19***             |
|                                                    | <i>Benefits</i> | --                       | 3.92        | --                  |
| <i>i-course</i> students<br>(n <sub>i</sub> = 232) | <i>SS</i>       | 3.58                     | 3.35        | -0.23***            |
|                                                    | <i>PV</i>       | 3.89                     | 3.92        | 0.03                |
|                                                    | <i>Benefits</i> | --                       | 3.48        | --                  |
| CURE<br>benchmark data <sup>3</sup>                | <i>SS</i>       | 3.64                     | 3.54        | -0.10               |
|                                                    | <i>PV</i>       | 4.11                     | 4.02        | -0.09               |
|                                                    | <i>Benefits</i> | --                       | 3.50        | --                  |

<sup>1</sup>Significance indicators:  $p < 0.05$  (\*),  $p < 0.01$  (\*\*),  $p < 0.001$  (\*\*\*)

<sup>2</sup>Change calculated from paired pre- and post-course responses

<sup>3</sup>Unpaired pre- and post-course numbers (see **Tables S6 & S7** above for the complete CURE benchmark dataset)
